# Supplementary material for: Inception of the ‘endocarditis team’ is associated with improved survival in patients with infective endocarditis who are managed medically: findings from a before-and-after study
Source: PubMed Central journal article supplement — Open Heart. 2017 Dec 27;4(2):e000699. doi: 10.1136/openhrt-2017-000699 (PMC5761279; doi:10.1136/openhrt-2017-000699), 2017-12-27
Supplement: openhrt-2017-000699supp001.pdf [file openhrt-2017-000699supp001.pdf]

## SUPPLEMENTARY FILES

**Supplementary Table 1.** Demographic, clinical, microbiology and echocardiographic characteristics of patients with definite endocarditis according to management strategy

| Variable                                | Surgery            |                     |             | Medical Therapy    |                     |             | Medical Therapy<br>(Surgical Turndown) |                    |             |
|-----------------------------------------|--------------------|---------------------|-------------|--------------------|---------------------|-------------|----------------------------------------|--------------------|-------------|
|                                         | (n = 137)          |                     |             | (n = 45)           |                     |             | (n = 14)                               |                    |             |
|                                         | Pre-ET<br>(n = 74) | Post-ET<br>(n = 63) | P-<br>value | Pre-ET<br>(n = 21) | Post-ET<br>(n = 24) | P-<br>value | Pre-ET<br>(n = 6)                      | Post-ET<br>(n = 8) | P-<br>value |
| Age (years)                             | 55.9±14.0          | 58.8±16.2           | 0.27        | 54.0±14.0          | 50.8±19.7           | 0.52        | 64.8±19.4                              | 67.3±15.9          | 0.81        |
| Male                                    | 49 (66.2)          | 50 (79.4)           | 0.13        | 15 (71.4)          | 17 (70.8)           | 1.00        | 3 (50.0)                               | 6 (75.0)           | 0.58        |
| Diabetes mellitus                       | 12 (16.2)          | 10 (15.9)           | 1.00        | 2 (9.5)            | 3 (12.5)            | 1.00        | 0 (0)                                  | 2 (25.0)           | 0.20        |
| EuroSCORE II                            | 11.5±10.8          | 13.6±10.4           | 0.25        | 10.8 ± 10.0        | 10.3 ± 9.2          | 0.86        | 16.9 ± 8.9                             | 17.3 ± 9.9         | 0.94        |
| <b>Biochemical results<sup>a</sup></b>  |                    |                     |             |                    |                     |             |                                        |                    |             |
| Serum eGFR (ml/min)                     | 67.0±26.2          | 66.8±22.9           | 0.69        | 68.5±23.4          | 60.8±30.7           | 0.49        | 62.0±33.0                              | 59.9±29.1          | 0.90        |
| Serum Hb (g/dL)                         | 91.3±34.0          | 90.3±35.9           | 0.88        | 94.6±27.4          | 89.6±22.1           | 0.51        | 82.5±37.2                              | 83.8±31.8          | 0.95        |
| Serum neutrophils (x10 <sup>9</sup> /L) | 8.9±5.4            | 8.4±5.2             | 0.60        | 9.2±4.6            | 7.1±4.6             | 0.13        | 10.8±6.1                               | 9.8±6.6            | 0.78        |
| Serum CRP (mg/L)                        | 93.1±68.6          | 100.1±76.5          | 0.58        | 103.7±61.8         | 97.3±97.6           | 0.80        | 61.0±39.3                              | 179.7±148.0        | 0.08        |
| <b>Predisposition to IE</b>             |                    |                     |             |                    |                     |             |                                        |                    |             |
| Cardiac disease <sup>b</sup>            | 22 (29.7)          | 17 (27.0)           | 0.85        | 7 (33.3)           | 7 (29.2)            | 1.00        | 1 (16.7)                               | 2 (25)             | 1.00        |
| Intravenous drug abuse                  | 5 (6.8)            | 5 (7.9)             | 1.00        | 4 (19.0)           | 3 (12.5)            | 0.69        | 1 (16.7)                               | 1 (12.5)           | 1.00        |
| History of IE                           | 7 (9.5)            | 6 (9.5)             | 1.00        | 3 (14.3)           | 3 (12.5)            | 1.00        | 0 (0)                                  | 0 (0)              | -           |
| Intervention (12 months) <sup>c</sup>   | 16 (21.6)          | 11 (17.5)           | 0.67        | 4 (19.0)           | 3 (12.5)            | 0.69        | 1 (16.7)                               | 0 (0)              | 0.43        |
| <b>Vegetation Localisation</b>          |                    |                     |             |                    |                     |             |                                        |                    |             |
| AV                                      | 28 (37.8)          | 25 (39.7)           | 0.87        | 8 (38.1)           | 12 (50.0)           | 0.52        | 3 (50.0)                               | 1 (12.5)           | 0.43        |

|                              |                |                |          |                |                |          |              |              |      |
|------------------------------|----------------|----------------|----------|----------------|----------------|----------|--------------|--------------|------|
| AV + aortic root             | 8 (10.8)       | 5 (7.9)        | 0 (0)    | 0 (0)          | 1 (16.7)       | 3 (37.5) |              |              |      |
| MV                           | 24 (32.4)      | 19 (30.2)      | 4 (19.0) | 5 (20.8)       | 1 (16.7)       | 3 (37.5) |              |              |      |
| AV + MV                      | 5 (6.8)        | 7 (11.1)       | 2 (9.5)  | 1 (4.2)        | 0 (0)          | 0 (0)    |              |              |      |
| TV                           | 6 (8.1)        | 4 (6.3)        | 4 (19.0) | 3 (12.5)       | 1 (16.7)       | 1 (12.5) |              |              |      |
| AV + MV + TV                 | 2 (2.7)        | 3 (4.8)        | 0 (0)    | 0 (0)          | 0 (0)          | 0 (0)    |              |              |      |
| Pacemaker lead               | 1 (1.4)        | 0 (0)          | 0 (0)    | 2 (8.3)        | 0 (0)          | 0 (0)    |              |              |      |
| No vegetation                | 0 (0)          | 0 (0)          | 3 (14.3) | 1 (4.2)        | 0 (0)          | 0 (0)    |              |              |      |
| <b>Valve type</b>            |                |                |          |                |                |          |              |              |      |
| Native                       | 53 (71.6)      | 46 (73.0)      | 1.00     | 13 (61.9)      | 16 (66.7)      | 1.00     | 5 (83.3)     | 6 (75.0)     | 1.00 |
| Prosthetic                   | 16 (21.6)      | 15 (23.8)      |          | 5 (23.8)       | 5 (20.8)       |          | 1 (16.7)     | 2 (25)       |      |
| <b>Native and Prosthetic</b> | <b>3 (4.1)</b> | <b>1 (1.6)</b> |          | <b>1 (4.8)</b> | <b>1 (4.2)</b> |          | <b>0 (0)</b> | <b>0 (0)</b> |      |
| <b>Causative organisms</b>   |                |                |          |                |                |          |              |              |      |
| Blood culture positive       | 60 (81.1)      | 58 (92.1)      | 0.08     | 16 (76.2)      | 20 (83.3)      | 0.71     | 6 (100)      | 7 (87.5)     | 1.00 |
| Viridans group streptococci  | 14 (18.9)      | 9 (14.3)       | 0.78     | 0 (0)          | 0 (0)          | 1.00     | 0 (0)        | 0 (0)        | 1.00 |
| Streptococcus gallolyticus   | 6 (8.1)        | 3 (4.8)        |          | 0 (0)          | 0 (0)          |          | 0 (0)        | 0 (0)        |      |
| Staphylococcus aureus        | 19 (25.7)      | 15 (23.8)      |          | 4 (19.0)       | 9 (37.5)       |          | 1 (16.7)     | 3 (37.5)     |      |
| Enterococci                  | 5 (6.8)        | 6 (9.5)        |          | 2 (9.5)        | 3 (12.5)       |          | 2 (33.3)     | 2 (25.0)     |      |

Data shown as mean  $\pm$  standard deviation or number (percentage). <sup>a</sup>admission values;

<sup>b</sup>rheumatic disease, prosthetic valve or valve repair; <sup>c</sup>dental or surgical interventions within the past 12 months. AV, aortic valve; CRP, C-reactive protein; ET, endocarditis team; IE, infective endocarditis; MV, mitral valve; TV, tricuspid valve.

**Supplementary Table 2: Timing of Surgery**

|                                                                             | Pre-ET (n = 74)                 |                                                     | Post-ET (n = 63)                |                                                     | Difference<br>in<br>Compliance<br>(%) | P-Value |
|-----------------------------------------------------------------------------|---------------------------------|-----------------------------------------------------|---------------------------------|-----------------------------------------------------|---------------------------------------|---------|
|                                                                             | Indication<br>n (% of<br>total) | Compliance<br>with<br>Timing<br>Indication<br>n (%) | Indication<br>n (% of<br>total) | Compliance<br>with<br>Timing<br>Indication<br>n (%) |                                       |         |
| <b>Emergency indication</b> (within 24 hours)                               | 13<br>(17.6)                    | 9<br>(61.5)                                         | 9<br>(14.3)                     | 8<br>(88.9)                                         | 27.4                                  | 0.36    |
| <b>Urgent indication</b> (within a few days)                                | 30<br>(40.5)                    | 19<br>(63.3)                                        | 29<br>(46.0)                    | 25<br>(86.2)                                        | 22.9                                  | 0.001   |
| <b>Elective indication</b> (after at least 1-2 weeks of antibiotic therapy) | 31<br>(41.9)                    | 31<br>(100)                                         | 25<br>(39.7)                    | 25<br>(100)                                         | 0                                     | -       |
| <b>All patients</b>                                                         | 74<br>(100)                     | 59<br>(79.7)                                        | 63<br>(100)                     | 58<br>(92.1)                                        | 12.4                                  | 0.05    |

Data shown as number (percentage). ET, endocarditis team.

**Supplementary Table 3.** Univariate analysis of mortality in the medical management group

| Variable                                             | In-hospital mortality |              |         | 1 year mortality |             |         |
|------------------------------------------------------|-----------------------|--------------|---------|------------------|-------------|---------|
|                                                      | Hazard Ratio          | 95% CI       | P-value | Hazard Ratio     | 95% CI      | P-value |
| Age (years)                                          | 1.01                  | 0.96 – 1.06  | 0.76    | 1.02             | 1.00 – 1.05 | 0.11    |
| Male                                                 | 0.84                  | 0.14 – 5.01  | 0.85    | 0.68             | 0.28 – 1.67 | 0.40    |
| Diabetes mellitus                                    | 3.39                  | 0.35 – 32.56 | 0.29    | 1.62             | 0.36 – 7.19 | 0.53    |
| EuroSCORE II                                         | 1.38                  | 0.47 – 4.04  | 0.56    | 1.28             | 0.44 – 4.31 | 0.56    |
| Serum eGFR (ml/min) <sup>a</sup>                     | 0.98                  | 0.95 – 1.01  | 0.26    | 0.99             | 0.97 – 1.01 | 0.39    |
| Serum haemoglobin (g/dL) <sup>a</sup>                | 1.01                  | 0.97 – 1.05  | 0.81    | 0.99             | 0.98 – 1.01 | 0.46    |
| Serum neutrophils (x10 <sup>9</sup> /L) <sup>a</sup> | 1.16                  | 1.00 – 1.33  | 0.05    | 1.09             | 1.01 – 1.09 | 0.03    |
| Serum CRP (mg/L) <sup>a</sup>                        | 1.00                  | 0.99 – 1.01  | 0.84    | 1.00             | 1.00 – 1.01 | 0.35    |
| Predisposing cardiac disease <sup>b</sup>            | 0.03                  | 0 – 67.27    | 0.36    | 1.28             | 0.51 – 3.21 | 0.60    |
| Intravenous drug abuse                               | 0.04                  | 0 – 1109.78  | 0.53    | 1.36             | 0.45 – 4.07 | 0.58    |
| History of IE                                        | 0.04                  | 0 – 2396.12  | 0.57    | 1.79             | 0.60 – 5.37 | 0.30    |
| Intervention (12 months) <sup>c</sup>                | 1.43                  | 0.16 – 12.82 | 0.75    | 1.65             | 0.48 – 5.65 | 0.43    |
| AV                                                   | 0.91                  | 0.15 – 5.43  | 0.92    | 0.98             | 0.40 – 2.41 | 0.97    |
| MV                                                   | 0.87                  | 0.10 – 7.79  | 0.90    | 0.74             | 0.25 – 2.20 | 0.58    |
| Left valve                                           | 1.51                  | 0.17 – 13.54 | 0.71    | 1.01             | 0.37 – 2.79 | 0.98    |
| Right valve                                          | 0.04                  | 0 – 357.21   | 0.48    | 1.13             | 0.38 – 3.39 | 0.83    |
| Native                                               | 1.89                  | 0.21 – 16.93 | 0.57    | 0.65             | 0.27 – 1.59 | 0.35    |
| Blood culture positive                               | 0.11                  | 0.02 – 0.64  | 0.01    | 0.28             | 0.10 – 0.73 | 0.01    |
| Staphylococcus aureus                                | 0.51                  | 0.06 – 4.53  | 0.54    | 0.77             | 0.30 – 2.02 | 0.61    |

|                                 |      |              |      |      |              |       |
|---------------------------------|------|--------------|------|------|--------------|-------|
| Immunological phenomena         | 0.04 | 0 – 24731.34 | 0.64 | 0.55 | 0.07 – 4.11  | 0.56  |
| Acute stroke                    | 4.15 | 0.69 – 24.93 | 0.12 | 5.06 | 1.94 – 13.21 | 0.001 |
| Other emboli                    | 0.55 | 0.06 – 4.94  | 0.60 | 1.47 | 0.60 – 3.60  | 0.40  |
| Congestive cardiac failure      | 0.05 | 0 – 8.77E+9  | 0.82 | 0.05 | 0 – 2807.55  | 0.59  |
| Uncontrolled Sepsis             | 1.98 | 0.33 – 11.85 | 0.46 | 1.67 | 0.67 – 4.20  | 0.27  |
| Renal failure <sup>d</sup>      | 0.04 | 0 – 6454.05  | 0.60 | 1.01 | 0.23 – 4.34  | 1.00  |
| Time to first TTE               | 0.86 | 0.59 – 1.23  | 0.40 | 0.99 | 0.93 – 1.04  | 0.60  |
| Time to TOE following TTE       | 0.79 | 0.42 – 1.52  | 0.48 | 1.09 | 0.81 – 1.28  | 0.71  |
| Time to IE specific antibiotics | 0.97 | 0.83 – 1.14  | 0.72 | 1.01 | 0.95 – 1.06  | 0.83  |
| Duration of stay                | 0.98 | 0.90 – 1.07  | 0.66 | 1.01 | 1.00 – 1.01  | 0.09  |
| ET                              | 0.57 | 0.10 – 3.40  | 0.54 | 0.38 | 0.16 – 0.95  | 0.04  |

Data shown as mean  $\pm$  standard deviation or number (percentage). <sup>a</sup>admission values;

<sup>b</sup>rheumatic disease, prosthetic valve or valve repair; <sup>c</sup>dental or surgical interventions within the past 12 months; <sup>d</sup>renal failure requiring renal replacement therapy. AV, aortic valve;

CRP, C-reactive protein; ET, endocarditis team; IE, infective endocarditis; MV, mitral valve;

TOE, transoesophageal echocardiogram; TTE, transthoracic echocardiogram.

**Supplementary Table 4.** Univariate analysis of mortality in the surgical management group

| Variable                                             | In-hospital mortality |             |         | 1 -year mortality |             |         |
|------------------------------------------------------|-----------------------|-------------|---------|-------------------|-------------|---------|
|                                                      | Hazard Ratio          | 95% CI      | P-value | Hazard Ratio      | 95% CI      | P-value |
| Age (years)                                          | 1.03                  | 0.98 – 1.08 | 0.23    | 1.04              | 1.00 – 1.07 | 0.03    |
| Male                                                 | 0.81                  | 0.25 – 2.63 | 0.73    | 1.45              | 0.55 – 4.00 | 0.43    |
| Diabetes mellitus                                    | 0.88                  | 0.11 – 7.14 | 0.90    | 0.99              | 0.29 – 3.37 | 0.99    |
| EuroSCORE II                                         | 1.09                  | 1.01 – 1.17 | 0.03    | 1.00              | 1.00 – 1.01 | 0.23    |
| Serum eGFR (ml/min) <sup>a</sup>                     | 0.98                  | 0.95 – 1.00 | 0.06    | 0.98              | 0.96 – 0.99 | 0.02    |
| Serum haemoglobin (g/dL) <sup>a</sup>                | 0.99                  | 0.97 – 1.01 | 0.21    | 0.99              | 0.98 – 1.00 | 0.10    |
| Serum neutrophils (x10 <sup>9</sup> /L) <sup>a</sup> | 1.04                  | 0.94 – 1.15 | 0.47    | 1.06              | 1.00 – 1.13 | 0.06    |
| Serum CRP (mg/L) <sup>a</sup>                        | 1.01                  | 1.00 – 1.02 | 0.04    | 1.01              | 1.00 – 1.01 | 0.05    |
| Predisposing cardiac disease <sup>b</sup>            | 1.27                  | 0.32 – 5.08 | 0.74    | 2.11              | 0.93 – 4.82 | 0.08    |
| Intravenous drug abuse                               | 0.04                  | 0 – 2478.59 | 0.58    | 1.17              | 0.27 – 4.99 | 0.83    |
| History of IE                                        | 0.04                  | 0 – 669.93  | 0.52    | 0.45              | 0.06 – 3.35 | 0.44    |
| Intervention (12 months) <sup>c</sup>                | 0.04                  | 0 – 37.60   | 0.35    | 0.36              | 0.08 – 1.51 | 0.16    |
| AV                                                   | 1.59                  | 0.43 – 5.92 | 0.49    | 0.78              | 0.34 – 1.81 | 0.57    |
| MV                                                   | 0.61                  | 0.13 – 2.93 | 0.54    | 0.92              | 0.38 – 2.23 | 0.85    |
| Left valve                                           | 0.32                  | 0.07 – 1.52 | 0.15    | 0.85              | 0.20 – 3.64 | 0.83    |
| Right valve                                          | 0.04                  | 0 – 669.93  | 0.52    | 1.45              | 0.43 – 4.89 | 0.55    |
| Native                                               | 0.44                  | 0.12 – 1.62 | 0.21    | 0.34              | 0.15 – 0.77 | 0.01    |
| Blood culture positive                               | 0.58                  | 0.12 – 2.77 | 0.49    | 0.42              | 0.17 – 1.08 | 0.07    |
| Viridans group streptococci                          | 0.82                  | 0.19 – 6.53 | 0.85    | 0.97              | 0.29 – 3.26 | 0.96    |
| Staphylococcus aureus                                | 1.72                  | 0.43 – 6.87 | 0.44    | 1.19              | 0.47 – 3.02 | 0.71    |

|                                 |      |              |      |      |              |       |
|---------------------------------|------|--------------|------|------|--------------|-------|
| Immunological phenomena         | 0.87 | 0.11 – 6.98  | 0.90 | 0.30 | 0.04 – 2.25  | 0.24  |
| Acute stroke                    | 1.68 | 0.42 – 6.70  | 0.47 | 1.18 | 0.46 – 2.98  | 0.73  |
| Other emboli                    | 1.36 | 0.36 – 5.05  | 0.65 | 1.33 | 0.58 – 3.02  | 0.50  |
| Congestive cardiac failure      | 1.21 | 0.25 – 5.85  | 0.81 | 1.47 | 0.58 – 3.74  | 0.42  |
| Uncontrolled Sepsis             | 2.31 | 0.58 – 9.24  | 0.23 | 1.70 | 0.67 – 4.31  | 0.27  |
| Valvular abscess                | 2.98 | 0.75 – 11.92 | 0.12 | 2.28 | 0.90 – 5.79  | 0.08  |
| Renal failure <sup>d</sup>      | 4.90 | 1.23 – 19.61 | 0.03 | 4.38 | 1.72 – 11.14 | 0.002 |
| Time to first TTE               | 1.01 | 0.96 – 1.06  | 0.76 | 0.99 | 0.94 – 1.04  | 0.70  |
| Time to TOE following TTE       | 1.00 | 0.95 – 1.06  | 0.96 | 1.01 | 0.97 – 1.04  | 0.70  |
| Time to IE specific antibiotics | 1.00 | 0.96 – 1.04  | 0.94 | 0.99 | 0.96 – 1.03  | 0.75  |
| Time to surgery                 | 0.97 | 0.89 – 1.06  | 0.47 | 1.00 | 0.98 – 1.03  | 0.86  |
| Duration of stay                | 1.00 | 0.95 – 1.04  | 0.82 | 1.38 | 0.27 – 7.07  | 0.70  |
| ET                              | 0.94 | 0.25 – 3.49  | 0.92 | 0.76 | 0.33 – 1.75  | 0.51  |

---

Data shown as mean  $\pm$  standard deviation or number (percentage). <sup>a</sup>admission values; <sup>b</sup>rheumatic disease, prosthetic valve or valve repair; <sup>c</sup>dental or surgical interventions within the past 12 months; <sup>d</sup>renal failure requiring renal replacement therapy. AV, aortic valve; CRP, C-reactive protein; ET, endocarditis team; IE, infective endocarditis; MV, mitral valve; TOE, transoesophageal echocardiogram; TTE, transthoracic echocardiogram.

**Supplementary Figure 1:** Indications for surgery according to time period

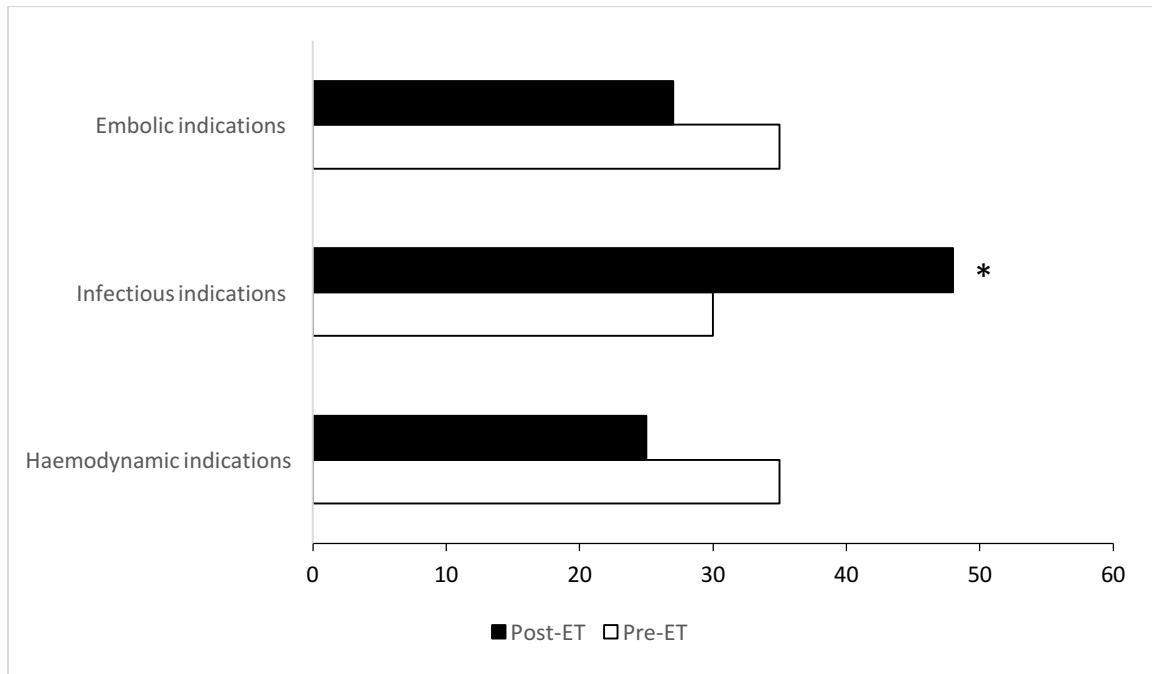

Indications for surgery in the pre-ET (white bar) and post-ET (black bar) periods. \*P-value<0.05 compared to pre-ET in the infections indications group. ET, endocarditis team.
